# Supplementary material for: The Impact of Exogenous Variables on Soybean Freight: A Machine Learning Analysis
Source: Preprints.org preprint supplement (doi:10.20944/preprints202410.1988.v1), 2024-10-25
Supplement: Supplementary file 1 [file supplementary]

## Sheet: Planilha1
Variable	Description	Classification	Minimum Value	Maximum Value	Occurrences	Total
1. Origin Municipality	Origin municipality of the soybean freight	Not applicable	-	-	-	7079
2. Origin State	Origin state of the soybean freight	Not applicable	-	-	-	7079
3. Destination Municipality	Destination municipality of the soybean freight	Not applicable		-	-	7079
4. Destination State	Destination state of the soybean freight	Not applicable	-	-	-	7079
5. Distance	Length of the route in kilometers	low	0	600	2923
		medium	600	1000	1975
		high	1000	3700	2181	7079
6. Month	Month in which the freight occurred	Not applicable	-	-	-	7079
7. Year	Year in which the freigh occured	Not applicable	-	-	-	7079
8. Municipal Production	Amount of soybeans produced in the municipality in tons	low	63	99864	1511
		medium	100138	397800	2341
		high	400200	2232000	3227	7079
9. Municipal Production Value	Value in thousands of BRL for the quantity produced in the municipality.	low	187	99876	1480
		medium	100328	695262	3632
		high	718303	2165794	1967	7079
10. Average Municipal Yield	Soybean production yield in kg/ha in the municipality	low	976	2997	1641
		medium	3000	3499	3737
		high	3500	4615	1701	7079
11. Municipality Planted Area	Number of hectares planted with soybeans in the municipality.	low	30	59595	2492
		medium	60000	196780	2227
		high	200000	625900	2360	7079
12. Municipality Harvest Area	Number of hectares where soybeans were harvested in the municipality	low	30	57728	2497
		medium	60000	199000	2247
		high	200000	620000	2335	7079
13. State Production	Amount of soybeans produced in the state in tons	low	144048	9870163	1870
		medium	10190023	19817679	2310
		high	26277753	27627757	2899	7079
14. Avarage State Yield	Soybean production yield in kg/ha in the state	low	1586	2999	1807
		medium	3000	3195	2135
		high	3196	3900	3137	7079
15. State Planted Area	Number of hectares planted with soybeans in the state.	low	34560	2861465	1637
		medium	2882207	5848766	2543
		high	8809092	9724213	2899	7079
16. State Harvest Area	Number of hectares where soybeans were harvested in the state	low	34560	2860835	1633
		medium	2861035	5819096	2547
		high	8809092	9724149	2899	7079
17. Diesel Avarege Price	Average diesel price in the month in BLR	low	1.74	2.2	2411
		medium	2.21	2.4	3332
		high	2.47	2.67	1336	7079
18. Ethanol Avarege Price	Average price of diesel in the month in BLR	low	0.88	1.75	2273
		medium	1.75	2	2854
		high	2.01	2.8	1952	7079
19. Gasoline Avarage Price	Average price of gasoline in the month in BLR	low	2.15	2.55	1676
		medium	2.77	2.8	3379
		high	2.87	3.25	2024	7079
20. State Storage Capacity at Origin	Storage capacity of the state of origin in thousands of tons.	low	373	29772	3724
		medium	30851	36206	1713
		high	36206	37928	1642	7079
21. State Storage Capacity at Destination	Storage capacity of the state of destination in thousands of tons.	low	3.2	5865	1551
		medium	8461.5	28742	2626
		high	28798.6	37928	2902	7079
22. Nacional Market	Value in BRL per 60-kilogram sack.	low	36.09	44.98	2988
		medium	45.03	49.93	2471
		high	56.91	63.77	1620	7079
23. International Market (Chicago)	Value in USD per ton.	low	763.41	822	1728
		medium	822.32	895.64	3166
		high	900.87	991.07	2185	7079
24. International Market (Parity)	Resale regulation level.	low	133.52	188.93	2868
		medium	188.93	229.77	2840
		high	246.95	266.5	1371	7079
25. Industry Capacity in the Origin State	Crushing capacity of the industry in the origin state in thouseand tons	low	300	10800	1596
		medium	24185	34995	2987
		high	35023	37610	2496	7079
26. Industry Capacity in the Destination State	Crushing capacity of the industry in the destination state in thouseand tons	low	300	10800	2692
		medium	24185	34995	2606
		high	35023	37610	1781	7079
27. Exchange Rate	Monthly Average Exchange Rate, Value in BRL for 1 USD	low	2.61	3.48	3684
		medium	3.5	3.79	1441
		high	3.83	4.03	1954	7079
28. Diesel Oil Import	Diesel Oil Import in cubic meters	low	217102	546062	1048
		medium	566044	987187	3082
		high	998334	3242332	2949	7079
29. Exportation Volum in the Origin State	Export Volume from Origin State in tons	low	0.3	149356	1011
		medium	150600	698172	2331
		high	701168	997485	3737	7079
30. Exportation Volum in the Destination State	Export Volume from Destination State in tons	low	31374.6	6622153	2989
		medium	7516117	9620097	1286
		high	14211053	20228381	2804	7079
31. Freight Price	Freight price adjusted according to IPCA (Broad National Consumer Price Index)	low	5.24	60	2505
		medium	60	100	2080
		high	100	315.51	2494	7079
